# Allosteric communications between domains modulate activity of matrix metalloprotease-1

Lokender Kumar<sup>1</sup>, Anthony Nash<sup>2</sup>, Chase Harms<sup>1</sup>, Joan Planas<sup>3</sup>, Derek Wright<sup>1</sup>, Judith Klein-Seetharaman<sup>3,4</sup>, and Susanta K. Sarkar<sup>1,\*</sup>

<sup>1</sup>*Department of Physics, Colorado School of Mines, USA*

<sup>2</sup>*Nuffield Department of Clinical Neurosciences, University of Oxford, UK*

<sup>3</sup>*Warwick Medical School, University of Warwick, UK*

<sup>4</sup>*Department of Chemistry, Colorado School of Mines, USA*

*Corresponding author:*

*\*ssarkar@mines.edu*

## ABSTRACT

The relation between structure and dynamics of biomolecules is important for their functions. Intra-domain dynamics occurring at pico- to milli-second timescales have been shown to correlate with activity. However, the correlation of allosteric communications between domains with biomolecular function is poorly understood. Here we show that inter-domain dynamics of matrix metalloprotease-1 (MMP1) on collagen fibrils are correlated with activity. Using single-molecule FRET, we identified the functionally relevant conformations where the two MMP1 domains are far apart, which were significantly absent for inactive MMP1 and could be modulated by inhibitor and enhancer of activity. All-atom and coarse-grained simulations reproduced the experimental features and revealed that dynamics are similar at pico- and milli-second timescales and substrate-dependent. Functional conformations are accompanied by larger catalytic pocket openings, which are increased by the communications mediated by collagen even if the domain linker is absent. Inter-domain communications are likely important for multidomain proteins in general.

**Keywords:** Inter-domain dynamics and activity, MMP1 conformational dynamics on type-1 collagen fibrils, Allosteric communications mediated by substrate, Single-molecule FRET.

39 The roles of protein conformational dynamics in activity are debated with arguments both in favor<sup>1</sup>  
40 and against<sup>2</sup>. A direct link between the hierarchies of conformational dynamics timescales from  
41 pico- to milli-second has been argued based on experimental and computational studies<sup>3</sup>. However,  
42 the debate has not been fully resolved. Collagen degradation by MMP1 provides a unique  
43 opportunity to define the relation of conformational dynamics with activity of a protein because  
44 both the catalytic and hemopexin domains of MMP1 are necessary to degrade structurally intact  
45 collagen<sup>4</sup>. Collagen is the primary component of the extracellular matrix (ECM) that provides a  
46 scaffold for cells to maintain tissue integrity. Degradation of fibrils by matrix metalloproteases  
47 (MMPs) is an integral part of tissue remodeling. MMP1, a collagenase in the 23-member MMP  
48 family, can degrade the most abundant type-1 collagen. MMP1 consists of a catalytic domain that  
49 degrades collagen, a hemopexin domain that helps MMPs bind to collagen, and a linker that  
50 mediates communications between the two domains. Interestingly, the catalytic domain sequence  
51 of MMP1 is very similar to other MMPs in the family, suggesting that differences in activity and  
52 substrate specificity among MMPs are likely caused by allosteric (far from the catalytic site)  
53 communications from other domains. Most studies have been reported with soluble collagen  
54 monomers. Each 300 nm long collagen monomer with a 1.5 nm diameter consists of three left-  
55 handed chains forming a right-handed triple-helical structure that hides the cleavage sites and  
56 makes collagen resistant to degradation. Biochemical studies with monomer revealed that MMP1  
57 actively unwinds the three chains of a monomer<sup>5</sup>. Using MD studies, the same results were  
58 reinterpreted and argued that collagen itself “breathes”, i.e. it partially unwinds itself due to  
59 thermal fluctuations, enabling MMP1 to bind and cleave collagen<sup>6</sup>, a conclusion for which  
60 additional experimental support was reported<sup>7</sup>. Indeed, computational and experimental studies  
61 revealed conformational dynamics between the catalytic and hemopexin domains of MMP1<sup>8</sup>. It  
62 should be noted that although the MMP1 catalytic domain alone (where the hemopexin domain  
63 has been truncated) can degrade denatured collagen (the cleavage sites are easily accessible), it  
64 cannot degrade the basic building block of collagen fibrils, i.e., triple-helical collagen (the cleavage  
65 sites are not easily accessible)<sup>4</sup>. Thus, both the hemopexin and catalytic domains are needed for  
66 degradation suggesting possible roles of inter-domain motions in activity. However, studies with  
67 collagen monomers do not reveal the complete information about physiologically important  
68 collagen fibrils for several reasons. First, collagen fibrils are insoluble and macroscopic, greatly  
69 complicating ensemble biochemical and kinetics studies. Fibrils are larger than MMPs in size and  
70 MMPs bind fibrils nonspecifically as well as at the partially unwound vulnerable sites on fibrils  
71 created during fibril assembly<sup>9,10</sup>. As such, binding to the cleavage sites is not a simple diffusion-  
72 limited process determined by the diffusion constant in solution. Also, the combined MMP1-fibril  
73 system is not statistically time-independent because the fibril itself changes as it is degraded by  
74 MMP1. Second, as monomers self-assemble into fibrils, the cleavage sites become less accessible  
75 compared to monomers due to covering by the C-terminal telopeptides<sup>11</sup>. Saffarian et al.<sup>12</sup> showed  
76 that collagen degradation biases the motion of MMP1 on type-1 collagen fibrils using Fluorescence  
77 Correlation Spectroscopy (FCS). Using single-molecule tracking of labeled MMP1 on type-1  
78 collagen fibrils, we showed that MMP1 diffusion is both biased and hindered due to cleavage<sup>10</sup>.  
79 MMP1 spends more than 90% of its time on the collagen fibril by diffusing, binding, and pausing  
80 without initiating degradation. Such extensive binding and pausing effectively regulate the rate of  
81 degradation and reduces the apparent catalytic rate of MMP1. The subsequent publication showed  
82 that fibrils also play a role in MMP1 activity due to vulnerable sites on fibrils caused by relaxation  
83 of strain during fibril assembly<sup>9</sup>. These results lead to the hypothesis that the overall catalytic rate  
84 of MMP1 depends not only on active site catalysis, but also on diffusive motion<sup>10</sup>, substrate

85 properties<sup>9</sup>, and conformational dynamics. Here we show that functionally relevant MMP1  
86 conformations have the catalytic and hemopexin domains far apart. These conformations are  
87 present in active MMP1 but significantly absent in inactive MMP1. These conformations are  
88 inhibited by tetracycline, an antibiotic that is known to inhibit MMP1 activity as well. In contrast,  
89 low FRET conformations are enhanced by MMP9, which can degrade denatured collagen but  
90 cannot degrade triple-helical collagen. Molecular dynamics simulations of active and inactive  
91 MMP1 bound to a model triple-helical collagen reproduce the experimental observations.  
92 Experimentally-validated MD simulations further revealed that MMP1 opens up its catalytic  
93 domain more compared to inactive MMP1. In addition, the root mean square (rms) distance  
94 between the MMP1 catalytic site and the cleavage sites on the collagen chains has a lower average  
95 value for active MMP1 compared to inactive MMP1.

96

## 97 **Results and discussion**

98 **Single-molecule measurement of MMP1 inter-domain dynamics on reconstituted type-1**  
99 **collagen fibril.** For our studies, we differentiated the role of activity by comparing the results for  
100 active (E219) with catalytically inactive (E219Q) MMP1. We mutated SER142 on the catalytic  
101 domain and SER366 on the hemopexin domain to cysteines (**Figure 1A**). Note that the amino acid  
102 E219<sup>13</sup> is the same as E200<sup>5</sup>, which differs due to the first residue used for counting. The distance  
103 between the central carbon atoms of the two selected amino acids is ~4.5 nm, which is similar to  
104 the Förster radius of the dye pair Alexa Fluor® 555 and Alexa Fluor® 647. We labeled MMP1  
105 with Alexa555 and Alexa647 using maleimide chemistry. The left panel of **Figure 1B** shows the  
106 gel electrophoresis of labeled MMP1, whereas the right panel (**Figure 1B**) shows the specific  
107 activities of labeled and unlabeled MMP1 on the synthetic peptide substrate, MCA-Lys-Pro-Leu-  
108 Gly-Leu-DPA-Ala-Arg-NH<sub>2</sub><sup>14</sup>. Labeling did not affect the activity of MMP1. We used a Total  
109 Internal Reflection Fluorescence (TIRF) microscope because many MMPs can be imaged  
110 simultaneously, in contrast to a confocal microscope with point-detection. We used the TIRF  
111 microscope in prism-type configuration (**Figure 1C**) because it has low background due to the  
112 separation of excitation and emission paths, in contrast to the objective-type TIRF microscope  
113 where the excitation and emission path share optics. As labeled MMPs moved and underwent  
114 inter-domain dynamics on the surface of a fibril, fluorescence emissions from the donor and  
115 acceptor dyes were detected using two quadrants (channels) of the EMCCD camera. Two channels  
116 were superimposed and the intensity and location of spots were tracked to measure both the  
117 diffusive motion and measure inter-domain dynamics) of MMP1. If there was relative motion  
118 between the MMP1 domains, energy transferred from Alexa555 to Alexa647 due to FRET,  
119 increasing the emission from Alexa647 and simultaneously reducing the emission from Alexa555.  
120 An example of anticorrelated emission from the two dyes due to MMP1 inter-domain dynamics is  
121 shown in **Figure 1D**. See Methods for detailed procedures.

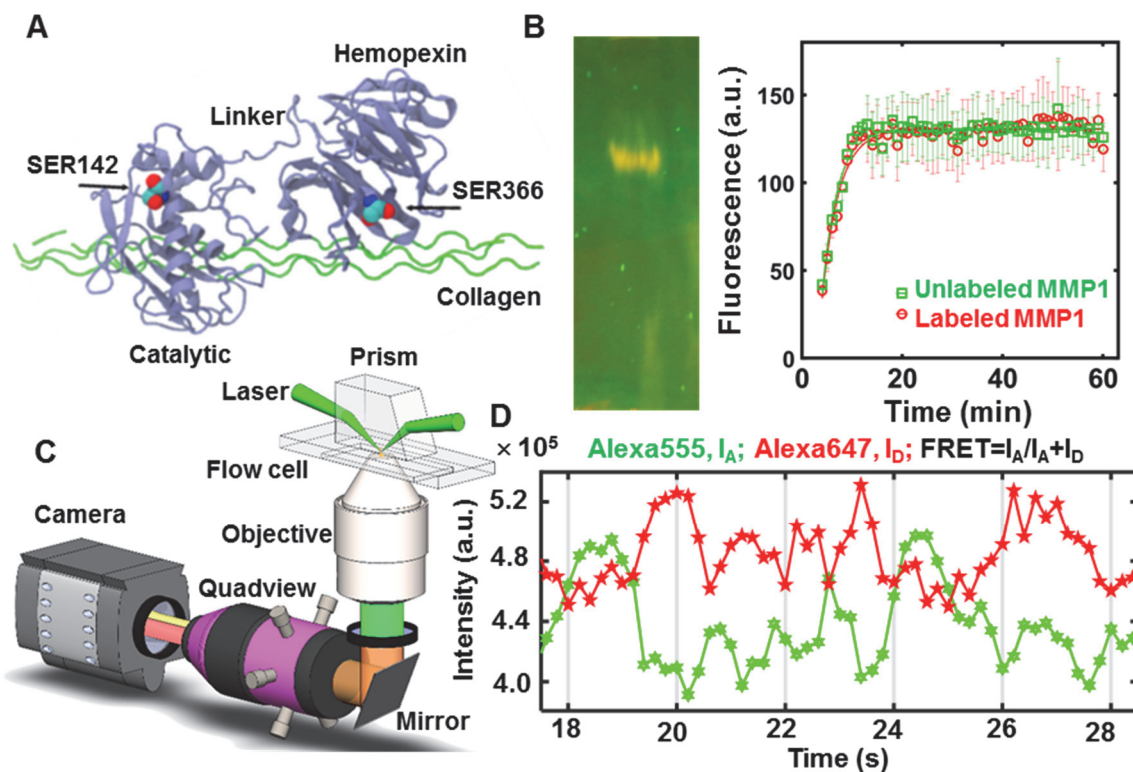

**Figure 1. Single-molecule measurement of MMP1 dynamics on type-1 collagen fibril.** (A) Relative positions of the domains and serine residues mutated to cysteines for labeling (created using PDB ID 4AUO). (B) Left panel: 12% SDS PAGE of labeled MMP1; Right panel: Fluorescence from degraded peptide substrate as a function of time for unlabeled (green squares) and labeled (red circles) MMP1 at 37°C. Solid lines are respective best fits to  $y=a-b*\exp(-kt)$ . After calibration, the specific activity is  $\sim 1000$  pmol/min/ $\mu\text{g}$ . The error bars are the standard deviations of 3 technical repeats. (C) Schematics of the TIRF microscope. (D) Emission intensities of the two dyes. Low FRET conformations lead to high Alexa555 emission, whereas High FRET conformations lead to Low Alexa555 emission. Anticorrelated Alexa647 and Alexa555 emissions,  $I_A$  and  $I_D$  respectively, indicate conformational dynamics of MMP1.

122 **Inter-domain dynamics and activity of MMP1 are functionally related.** The role of dynamics  
 123 in activity is not clear: Warshel proposes that protein dynamics and enzyme catalysis are not  
 124 coupled<sup>2,15</sup>, but Karplus proposes that enzyme motions can lower the activation energy<sup>1,3</sup>. Single-  
 125 molecule measurements of inter-domain dynamics (**Figure 2**) of active and inactive MMP1  
 126 suggest that the low FRET conformations, where two domains are far apart, are relevant for  
 127 catalysis. To further delineate the relation between conformations and activity, we used two  
 128 ligands: MMP9 and tetracycline. MMP9, another member of the MMP family that can degrade  
 129 denatured collagen, is generally thought to be unable to degrade triple-helical type-1 collagen<sup>16</sup>.  
 130 MMP9 can be found in both pro-form<sup>17,18</sup> and activated forms<sup>19-22</sup> in physiological conditions. It  
 131 has been reported that MMP9 and MMP1 form a stable complex<sup>23</sup> and computational studies have  
 132 predicted enhancement of MMP1 activity<sup>24</sup>. Tetracycline has been shown to play dual roles as  
 133 antibiotics and MMP inhibitors<sup>25</sup>.

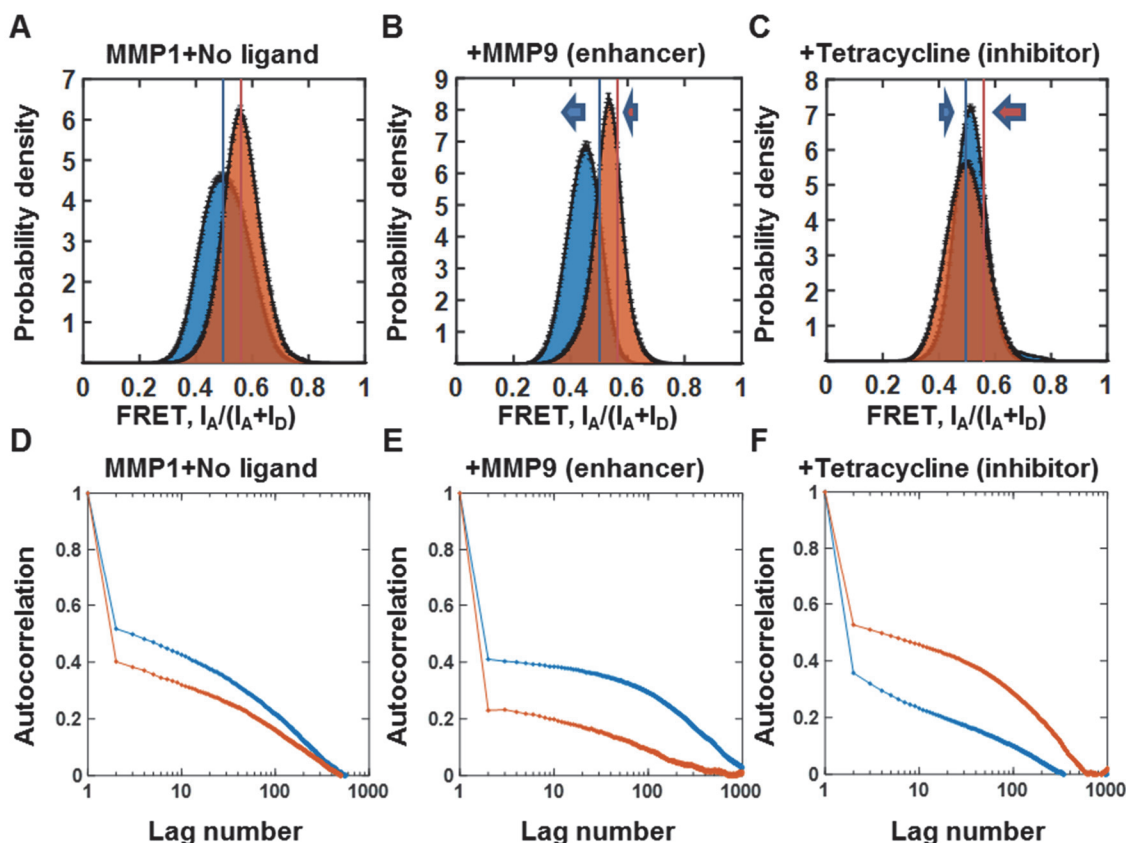

**Figure 2. Activity-dependent inter-domain dynamics of MMP1 on reconstituted type-1 collagen fibrils at 22°C with 100 ms time resolution.** Area-normalized histograms of MMP1 inter-domain distance (more than 300,000 FRET values for each condition; bin size=0.005) for active (blue) and inactive (orange) MMP1 (A) without ligand, (B) in the presence of MMP9 (an enhancer), and (C) in the presence of tetracycline (an inhibitor). The error bars in histograms represent the square roots of histogram bin counts. Blue and orange lines indicate the peak positions for active and inactive MMP1 without ligands. Low FRET conformations, where the inter-domain distance is larger, are functionally important. Autocorrelation of MMP1 inter-domain distance for active (blue) and inactive (orange) MMP1 (D) without ligand, (E) in the presence of MMP9, and (E) in the presence of tetracycline. The error bars in autocorrelations represent the standard error of mean calculated from individual FRET trajectories.

134 In the presence of MMP9, which forms a complex with MMP1 and has been predicted to enhance  
 135 MMP1 activity<sup>24</sup>, the peaks of conformational histograms shift towards left (indicated by arrows)  
 136 as shown in **Figure 2B**. MMP9 not only enables more low FRET conformations of MMP1, but it  
 137 also stabilizes low FRET conformations as indicated by narrow widths of histograms (**Figure 2B**)  
 138 and longer correlation times (**Figure 2E**). In contrast, tetracycline inhibits low FRET  
 139 conformations and appears to shift conformations for both active and inactive MMP1 towards the  
 140 middle (**Figure 2C**). Since correlated motions indicate a decrease conformational entropy and can  
 141 affect kinetics and thermodynamics of biological processes including catalysis<sup>26</sup>, we calculated  
 142 autocorrelation function of MMP1 conformational dynamics under different experimental  
 143 conditions (**Figures 2D-2F**). Without any ligand, active MMP1 had more time-correlated  
 144 conformational dynamics than inactive MMP1 (**Figure 2D**). In the presence of MMP9, the time-  
 145 correlations were longer for both active and inactive MMP1 (**Figure 2E**). Interestingly,



146 tetracycline reversed the trend and inactive MMP1 had longer time-correlation than active MMP1  
147 (**Figure 2F**). Taken together, these results strongly suggest that inter-domain dynamics and  
148 activity of MMP1 are functionally related. Nevertheless, a larger inter-domain distance could be a  
149 “consequence” or the “cause” of catalytic activity. We argue that low FRET conformations are  
150 likely the “cause” for several reasons. First, a mutation E219Q at the catalytic site not only renders  
151 MMP1 inactive, but it also induces changes far away (allosteric) to alter the inter-domain  
152 dynamics. Second, changes in the linker region also have been shown to affect activity  
153 allosterically<sup>27</sup>. Third, the catalytic domains of MMPs are largely conserved<sup>28</sup>, suggesting a key  
154 role of the hemopexin domains in human MMPs can lead to substrate specificity<sup>29</sup> via allosteric  
155 inter-domain communications. Fourth, although the MMP1 catalytic domain alone (where the  
156 hemopexin domain has been truncated) can degrade denatured collagen (the cleavage sites are  
157 easily accessible), it cannot degrade the basic building block of collagen fibrils, i.e., triple-helical  
158 collagen (the cleavage sites are not easily accessible)<sup>4,30,31</sup>. Thus, both the hemopexin and catalytic  
159 domains are needed for triple-helical collagen degradation.

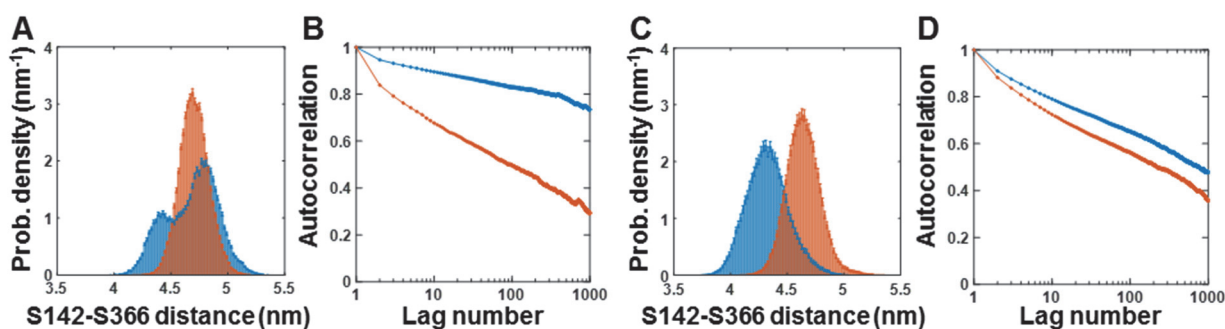

**Figure 3. All-atom MD simulations with collagen backbone restrained (A and B) and unrestrained (C and D).** Modified GROMACS topology files used in the previously published work by Nash et al. [64] were used for simulations at 37°C with 2 fs time step; data saved every 5 ps; 225 ns and 700 ns simulations for restrained and unrestrained respectively. Area-normalized simulated histograms with bin size=0.02 (A) and autocorrelation function (B) for active (blue) and inactive (orange) when the collagen backbone was restrained with an energy penalty of 1000 kJ/mol. Area-normalized simulated histograms (C) and autocorrelation function (D) for active (blue) and inactive (orange) when the collagen backbone was unrestrained.

160 **MMP1 conformations are similar at two extreme timescales and change upon substrate**  
161 **binding.** The MMP1 catalytic cleft (~0.5 nm wide) is too narrow to accommodate the collagen  
162 monomer (1.5 nm in diameter)<sup>8</sup>. Therefore, a larger opening of the MMP1 catalytic pocket is  
163 needed to accommodate collagen and must accompany a larger inter-domain dynamics if low  
164 FRET conformations are indeed important. To this end, we confirmed the activity-dependent inter-  
165 domain dynamics of active and inactive MMP1 using all-atom simulations (see Methods). As  
166 shown in **Figure 3A**, all-atom simulations reproduce that active MMP1 has more low FRET  
167 conformations when the collagen is restrained. The autocorrelation functions (**Figure 3B**) for  
168 simulated inter-domain distances also agree with experimental observations of higher correlation  
169 for active MMP1. Interestingly, the simulated conformational histograms (**Figure 3C**) are flipped  
170 when the collagen backbone was not restrained. In addition, the difference in autocorrelations for  
171 active and inactive MMP1 on unrestrained collagen (**Figure 3D**) is significantly lower than those  
172 on restrained collagen (**Figure 3B**). These results suggest that collagen monomers in fibrils are

173 relatively fixed in place. Furthermore, simulations also suggest that MMP1 dynamics vary  
174 depending on the substrate properties, i.e., enzyme-substrate interactions are mutually affected by  
175 each other. Thus, experiments and simulations mutually validated each other.

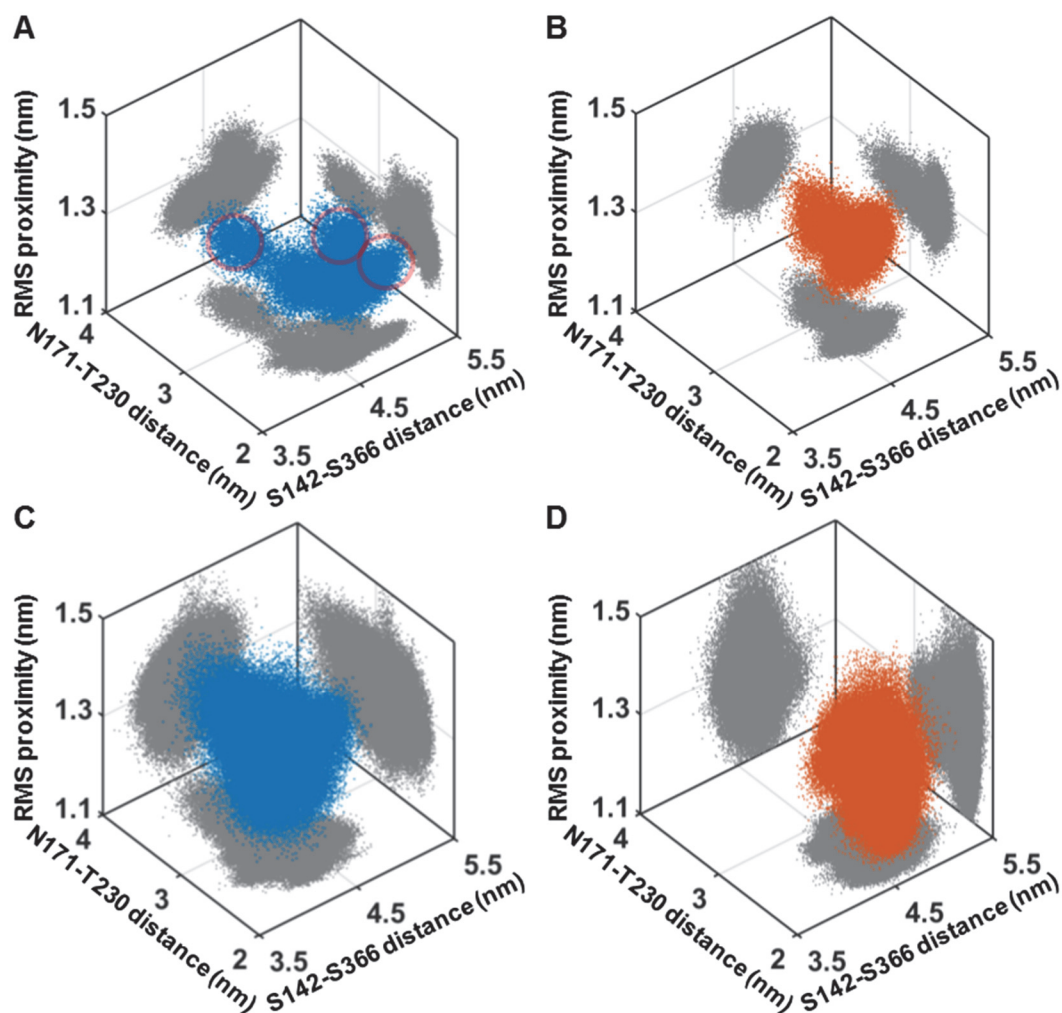

**Figure 4. Insights from validated all-atom MD simulations with collagen backbone restrained (A and B) and unrestrained (C and D).** Three dimensional scatter plots of S142-S366 distance (represents inter-domain dynamics), N171-T230 distance (represents the opening of the MMP1 catalytic pocket), and root mean square (rms) distance between the MMP1 catalytic site and the cleavage sites on three collagen chains for active (blue) and inactive (orange) MMP1. Two-dimensional projections of the scatter plots are in gray color. The plausible catalytically relevant conformations are indicated by the clusters encircled in red in (A).

176 Informed by single-molecule measurements of MMP1 inter-domain dynamics, we used MD  
177 simulations to identify catalytically relevant conformations more precisely. We assumed that the  
178 catalytic pocket should open up more before catalysis so that the catalytic residues can approach  
179 the cleavage sites on the three collagen chains. We measured the catalytic pocket opening by the  
180 distance between N171 and T230 and measured the proximity by the root mean square of the  
181 distances between the MMP1 residue (E/Q219) and the collagen cleavage sites (G~L). Three  
182 dimensional scatter plots (**Figure 4**) show the structures in the partial MMP1 conformational

183 landscape. **Figure 4A** suggests that the encircled clusters are likely the functionally relevant  
184 conformations of MMP1 because these conformations are significantly absent in inactive MMP1  
185 (**Figure 4B**). When the collagen backbone is not restrained, the finer structures of the  
186 conformational space disappear (**Figures 4C** and **4D**). Interestingly, the number of conformational  
187 peaks depends on the projection plane (reaction coordinates). Overall, the preponderance of  
188 evidence suggests that a larger inter-domain distance is critical for MMP1 activity.

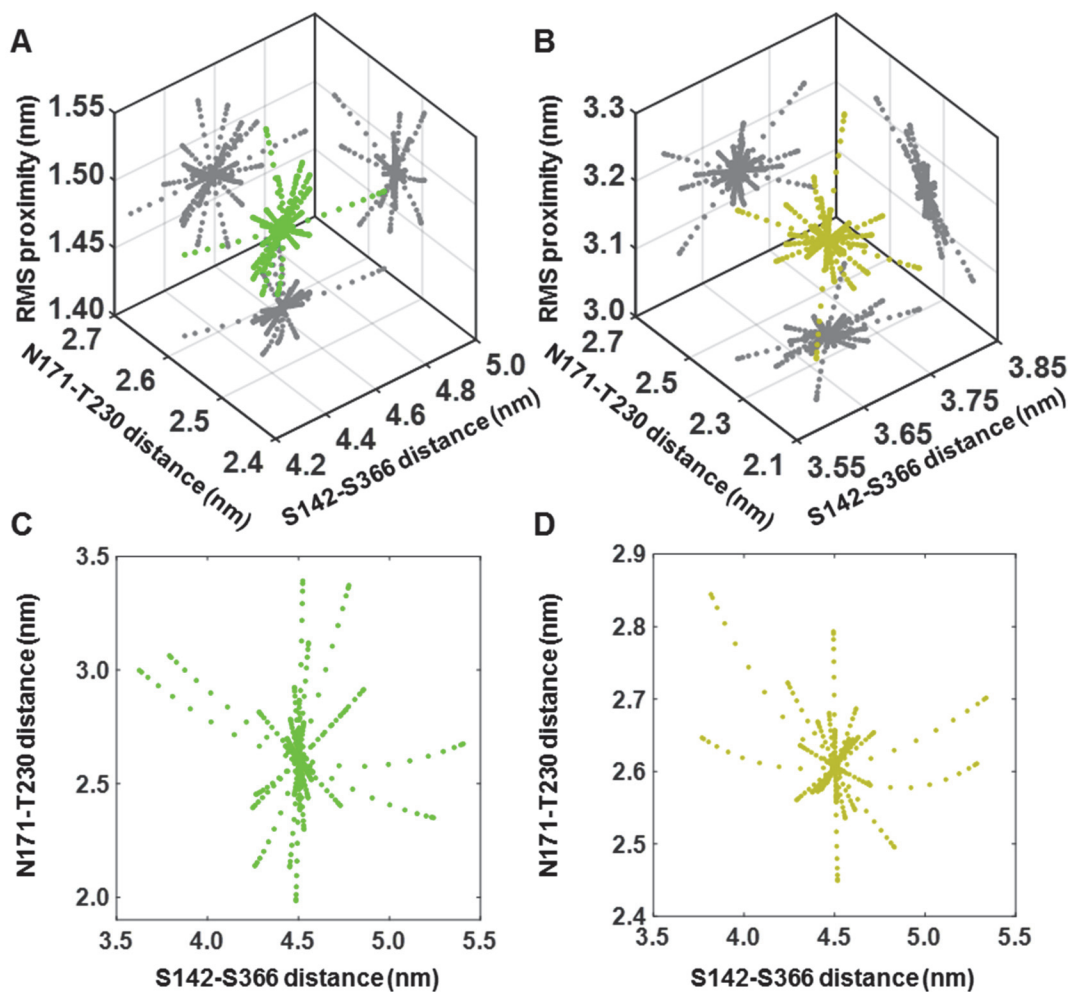

**Figure 5. Normal mode analysis of MMP1 using the Anisotropic Network Model.** Three dimensional scatter plots of S142-S366 distance (represents inter-domain dynamics), N171-T230 distance (represents opening of the MMP1 catalytic pocket), and root mean square (rms) distance between the MMP1 catalytic site and the cleavage sites on three collagen chains for collagen-bound active (green) (**A**) and pro (greenish-yellow) MMP1 (**B**). Two-dimensional projections in **A** and **B** of the scatter plots are in gray color. Two dimensional scatter plots of S142-S366 distance and N171-T230 distance for free active (green) (**C**) and pro (greenish-yellow) MMP1 (**D**).

189 On the one hand, simulations were performed starting from the crystal structure of collagen-bound  
190 MMP1, which is generally the most favorable conformations thermodynamically and kinetically.  
191 On the other hand, smFRET measurements are performed on collagen-bound MMP1, which also  
192 provides favored states. As such, functionally relevant MMP1 inter-domain conformations appear  
193 at the two extreme timescales quickly. Both the experiments (**Figure 2**) on collagen fibrils at 100



194 ms timescale and the simulations (**Figure 4**) with collagen monomer at 5 ps timescale showed that  
195 active MMP1 adopts more conformations with larger inter-domain distances.

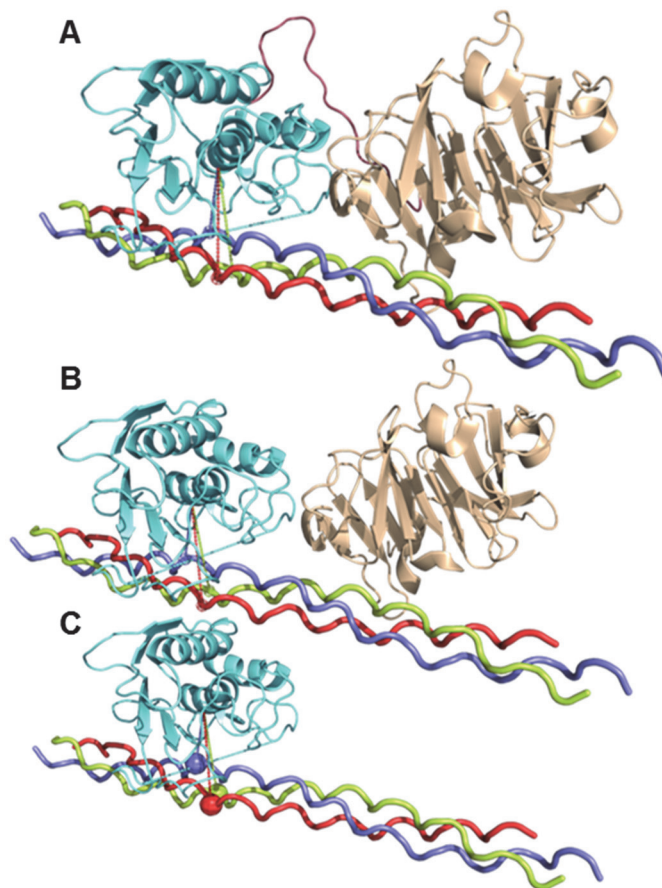

**Figure 6. Inter-domain communications via collagen even without the linker.** ANM simulations of the catalytic pocket opening as measured by the distance between N171 and T230 (cyan line) is (A)  $2.56 \pm 0.52$  nm, (B)  $2.56 \pm 0.26$ , and (C)  $2.55 \pm 0.19$ . The error bars represent the standard deviations of top three normal modes as measured by the catalytic pocket opening. The catalytic domain (cyan), the linker (brown), and the hemopexin (wheat) domains are defined between the residues V101 and Y260, G261 and C278, and D279 and C466 respectively.

196 Further, MMP1 is not static at the most favored conformation as envisioned in “lock-and-key”,  
197 “induced fit”, and “conformational selection” theories of enzyme specificity and function. Rather,  
198 MMP1 undergoes conformational dynamics that have two dynamic parts: one that has  
199 conformations with functionally relevant larger inter-domain distances and the other without  
200 functionally relevant conformations. It is often considered that a protein has a set of allowed  
201 conformations and a ligand selects the compatible protein conformation from this set. For MMP1,  
202 however, ligand binding can change the set of allowed conformations. Therefore, an alternative  
203 model of “adaptive conformational dynamics” can be proposed where the substrate recognition  
204 and function of a protein is dynamically influenced by mutations and ligands. In addition, the  
205 mutation E219Q at the catalytic site of MMP1 also changes the set of allowed conformations that  
206 appear at the two extreme timescales of all-atom simulations (**Figures 3 and 4**) and experiments  
207 (**Figure 2**).

208 **Inter-domain communications are facilitated by both the linker and the collagen substrate.**

209 To gain more insights faster, we computed preferred conformations or “normal modes” of  
210 collagen-bound MMP1 using the Anisotropic Network Model (ANM)<sup>32</sup>. The ANM is a prediction  
211 method that models each amino acid as a bead and creates a virtual bond network that connects  
212 these beads based on a user-defined cut-off distance<sup>32,33</sup>. By modeling these virtual bonds using  
213 the harmonic oscillator model, we obtained an integrated view of the restrictions in conformational  
214 space experienced by each bead and in turn, predicted what motions are accessible to MMP1.  
215 ANM cannot distinguish between active and inactive MMP1. Therefore, we calculated normal  
216 modes for proMMP1 as a proxy for inactive MMP1 because pro MMP1 cannot degrade collagen-  
217 like inactive MMP1. As such, we expected that the catalytic pocket opening and proximity to the  
218 collagen chains for proMMP1 would be restricted. We calculated normal modes for collagen-  
219 bound (**Figures 5A and 5B**) and free (**Figures 5C and 5D**) MMP1 for active and pro MMP1. As  
220 shown in **Figure 5**, free and collagen-bound MMP1 have some similarities in allowed normal  
221 modes but some modes of free MMP1 disappear and some new modes appear for collagen-bound  
222 MMP1. For active MMP1, the catalytically relevant intra- and inter-domain distances from ANM  
223 simulations (**Figure 5A**) agreed well with those from all-atom simulations (**Figure 4A**). When  
224 MMP1 was not bound, the ANM calculations showed different normal modes for both active  
225 (**Figure 5C**) and pro (**Figure 5D**) compared to the collagen-bound MMP1. These results further  
226 confirmed that the collagen substrate can significantly change MMP1 dynamics and validated the  
227 ANM simulations. We then investigated if the communications between the catalytic and  
228 hemopexin domains can be communicated by both the linker and collagen. **Figure 6** shows that  
229 the catalytic domain opening has the largest standard deviation when both the linker and collagen  
230 are present (**Figure 6A**) and has the smallest standard deviation when only the catalytic domain is  
231 present (**Figure 6C**), which suggest the essential role of the hemopexin domain in MMP1 activity.  
232 To confirm further, we computed conformations without the linker and observed that the  
233 hemopexin domain can still influence the catalytic domain plausibly via collagen and increase the  
234 catalytic pocket opening (**Figure 6B**). In other words, the two MMP1 domains can communicate  
235 via the linker as well as collagen. Interestingly, it has been reported previously that a mixture of  
236 the two MMP1 domains purified separately can degrade triple-helical collagen<sup>4</sup> but the reason was  
237 not clear. A larger catalytic opening due to allosteric communications between the two MMP1  
238 domains via collagen provides an explanation why even a mixture of the two MMP1 domains can  
239 degrade triple-helical collagen. While autocorrelation functions are simple measures of  
240 randomness, entropy is another measure of randomness that connects to kinetics and  
241 thermodynamics. Any correlated motion or stabilization of conformations indicates a decrease in  
242 randomness (entropy). Enabling access to the cleavage sites on triple-helical collagen via inter-  
243 domain dynamics of MMP1 is an entropy-driven process.

244 In summary, we have measured the inter-domain dynamics of MMP1 at the single-molecule level  
245 with and without ligands. Both coarse-grained ANM simulations and all-atom MD simulations  
246 were validated by single-molecule measurements and new insights into the MMP1 dynamics were  
247 obtained from validated simulations. Larger inter-domain motion of MMP1 is accompanied by a  
248 larger catalytic pocket opening of the catalytic domain and a smaller rms distance between the  
249 MMP1 catalytic site and the cleavage sites on collagen. The allosteric approach to modulate  
250 function will be applicable to other multidomain proteins including surface receptors, enzymes,  
251 and intracellular signaling proteins.

## 252 METHODS SUMMARY

253 **Purification, labeling, and ensemble activity measurements of MMPs.** Full-length recombinant  
254 MMPs were expressed in *E. coli* and purified in activated form using a protease based purification  
255 method<sup>13</sup>. Purified MMP1 was labeled with AlexaFluor555 (donor dye) and AlexaFluor647  
256 (acceptor dye) using maleimide chemistry. 1 mL of MMP1 at 1 mg/mL concentration was  
257 incubated with 20  $\mu$ L of 1 mg/mL AlexaFluor555 and AlexaFluor647 for 60 minutes in a 5 mL  
258 glass vial with continuous nitrogen flow to avoid oxidation of the dyes. After incubation, the  
259 sample was filtered three times using a 30 kDa cut-off Amicon filter to remove free dyes from the  
260 solution. The labeled MMP1 was analyzed using 12% SDS PAGE and the activity of labeled  
261 MMP1 was compared with the activity of unlabeled protein on the synthetic substrate, MCA-Lys-  
262 Pro-Leu-Gly-Leu-DPA-Ala-Arg-NH<sub>2</sub>, (R&D Systems, Cat# ES010) as described before<sup>13</sup>.

263 **Single-molecule measurements.** A thin layer of reconstituted type-1 collagen fibrils was created  
264 on a quartz slide by neutralizing the solution of type-1 collagen monomers and incubating at 37°C.  
265 Alexa555 dyes attached to MMP1 was excited at 532 nm inside a flow cell made from double-  
266 sided tape sandwiched between the quartz slide and a glass coverslip using the evanescent wave  
267 created at the interface of the quartz slide and sample in a Total Internal Reflection Fluorescence  
268 (TIRF) Microscope as described before<sup>9,10</sup>. Alexa647 and Alexa555 emissions were imaged by  
269 two quadrants of an EMCCD camera (Andor iXon). Two emission channels were superimposed  
270 using a pairwise stitching plugin of ImageJ and the emission intensities from the two dyes were  
271 extracted and analyzed using Matlab.

272 **Normal mode analysis using Anisotropic Network Model.** Anisotropic Network Model (ANM)  
273 calculations were performed on the first biological assembly (chains A, C-E) of the crystal  
274 structure of MMP-1 in complex with a triple-helical collagen peptide (PDB: 4UAO, [PMID:  
275 22761315]) using ANM web server 2.1 [PMID: 25568280] with default parameters. Three-  
276 dimensional fluctuation model coordinate files were obtained for the 20 slowest modes requesting  
277 20 frames per model. For each frame on each model, selected distances were calculated using  
278 Pymol [The PyMOL Molecular Graphics System, Version 1.8, Schrödinger, LLC]. Distances  
279 between S142 and S366 were used to analyze the fluctuations between the catalytic and hemopexin  
280 domains; between N171 and T230 to analyze the fluctuations corresponding to the opening and  
281 closing of the catalytic site; and between A219 and the cleaving site in each collagen chain (defined  
282 as the middle point of the segment between G975 and C976 alpha carbons) to analyse the cleaving  
283 potential of each of the 20 slowest modes.

284 **All-atom molecular dynamics simulations.** All-atom Molecular Dynamics (MD) simulations  
285 were performed using GROMACS version 2018.2<sup>34</sup>. A leapfrog integration time step of 2 fs was  
286 applied and all bonded interactions were constrained using the LINCS constraint algorithm<sup>35</sup>. The  
287 short-range neighbor interaction list cut-off was updated every 10 fs and fixed to 0.8 nm. Short-  
288 range interactions were modeled using a 12-6 Lennard-Jones potential truncated at 0.8 nm and  
289 electrostatic interactions were truncated at 0.8 nm. Long-range electrostatic interactions were  
290 calculated using the Particle Mesh Ewald scheme<sup>36</sup>. Using the Nose-Hoover thermostat the  
291 temperature was maintained at 310 K<sup>37</sup> and by applying an isotropic coupling Parrinello-Rahman  
292 scheme<sup>38</sup> the pressure was maintained at one atmosphere. The simulation cell was defined using  
293 periodic boundary conditions in three dimensions. The coordinates, velocities, and energies were  
294 saved every 5 ps. We used the crystal structure (PDB ID 4AUO) of inactive MMP1 (E219A) bound  
295 to model triple-helical collagen monomer. We modified residues to match the amino acid  
296 sequences of active and inactive MMP1 used in smFRET experiments. Two cysteine to serine

297 substitutions (C142S and C366S) used for labeling MMP1 were incorporated in the structure as  
298 well for simulations. Additionally, an alanine to glutamine substitution A219Q was incorporated  
299 to match the sequence of inactive MMP1. The initial collagen-bound MMP1 complex crystal  
300 structure (4AUO), along with the parameterization and implementation steps for the bond  
301 distances and angles, respective force constants and partial charges of the zinc-binding sites were  
302 repeated as discussed in earlier work<sup>39</sup>. Amino acid substitutions were performed using  
303 Schrödinger Maestro (Schrödinger Release 2015-4). Each protein complex was centered in a cubic  
304 unit cell sufficiently large enough to avoid periodic boundary artifacts. Both unit cells were  
305 solvated used TIP4P water molecules and counterions were added to neutralize the system. Both  
306 solvated protein-complex systems were subjected to a steepest descent energy minimization with  
307 a maximum force of 1000 kJ/mol stopping criteria to correct for steric clashes between atoms.  
308 Position restraints of 1000 kJ/mol were applied to all protein heavy atoms and both minimized  
309 structures underwent a 10 ps molecular dynamics simulation using the NVT (fixed particles,  
310 volume, and temperature) ensemble. The position restraints were maintained and the simulation  
311 was extended by 200 ps with constant pressure using the Parrinello-Rahman pressure coupling  
312 scheme. Each simulation was extended by a series of 200 ps intervals, systematically reducing the  
313 position restraints by an order of magnitude to a final 10 kJ/mol. All position restraints were  
314 removed with the exception to those on the collagen alpha-carbon atoms which were increased to  
315 150 kJ/mol. This was to prevent the fraying of the short collagen whilst the structure relaxed. Both  
316 systems underwent a 300 ns NPT (fixed particles, pressure and temperature) production  
317 simulation. The position restraints were removed from the collagen alpha-carbon and both systems  
318 underwent a further 700 ns of NPT simulation time for a total simulation time of 1  $\mu$ s.  
319

319

## 320 **ACKNOWLEDGMENTS**

321 The authors acknowledge John Czerski and Danielle Forristall for participating in the initial stage  
322 of single-molecule FRET measurements and analyses.  
323

323

## 324 **AUTHOR CONTRIBUTIONS**

325 S.K.S. conceived and designed the overall project. L.K. and S.K.S. designed experiments. L.K.  
326 performed experiments. A.N. performed all-atom simulations. C.H. wrote codes for analyzing  
327 smFRET. J.P. performed ANM simulations and molecular docking. L.K., A.N., J.P., D.R., J.K.S.,  
328 and S.K.S. analyzed data. S.K.S. wrote the initial manuscript. All authors read and edited the  
329 manuscript.  
330

330

## 331 **COMPETING FINANCIAL INTERESTS**

332 The authors declare no competing financial interests.



- 333 1 Karplus, M. Role of conformation transitions in adenylate kinase. *Proceedings of the*  
334 *National Academy of Sciences* **107**, E71-E71 (2010).
- 335 2 Pisljakov, A. V., Cao, J., Kamerlin, S. C. & Warshel, A. Enzyme millisecond  
336 conformational dynamics do not catalyze the chemical step. *Proceedings of the National*  
337 *Academy of Sciences* **106**, 17359-17364 (2009).
- 338 3 Henzler-Wildman, K. A. *et al.* A hierarchy of timescales in protein dynamics is linked to  
339 enzyme catalysis. *Nature* **450**, 913 (2007).
- 340 4 Chung, L. D. *et al.* Collagenase unwinds triple-helical collagen prior to peptide bond  
341 hydrolysis. *Embo Journal* **23**, 3020-3030 (2004).
- 342 5 Manka, S. W. *et al.* Structural insights into triple-helical collagen cleavage by matrix  
343 metalloproteinase 1. *Proc Natl Acad Sci U S A* **109**, 12461-12466,  
344 doi:10.1073/pnas.1204991109 (2012).
- 345 6 Nerenberg, P. S., Salsas-Escat, R. & Stultz, C. M. Do collagenases unwind triple-helical  
346 collagen before peptide bond hydrolysis? Reinterpreting experimental observations with  
347 mathematical models. *Proteins: Structure, Function, and Bioinformatics* **70**, 1154-1161  
348 (2008).
- 349 7 Leikina, E., Mertts, M. V., Kuznetsova, N. & Leikin, S. Type I collagen is thermally  
350 unstable at body temperature. *Proceedings of the National Academy of Sciences of the*  
351 *United States of America* **99**, 1314-1318 (2002).
- 352 8 Karabancheva-Christova, T. G., Christov, C. Z. & Fields, G. B. Conformational Dynamics  
353 of Matrix Metalloproteinase-1· Triple-Helical Peptide Complexes. *The Journal of Physical*  
354 *Chemistry B* (2017).
- 355 9 Dittmore, A. *et al.* Internal strain drives spontaneous periodic buckling in collagen and  
356 regulates remodeling. *Proceedings of the National Academy of Sciences*, 201523228  
357 (2016).
- 358 10 Sarkar, S. K., Marmer, B., Goldberg, G. & Neuman, K. C. Single-molecule tracking of  
359 collagenase on native type I collagen fibrils reveals degradation mechanism. *Current*  
360 *biology : CB* **22**, 1047-1056, doi:10.1016/j.cub.2012.04.012 (2012).
- 361 11 Perumal, S., Antipova, O. & Orgel, J. P. R. O. Collagen fibril architecture, domain  
362 organization, and triple-helical conformation govern its proteolysis. *Proceedings of the*  
363 *National Academy of Sciences of the United States of America* **105**, 2824-2829 (2008).
- 364 12 Saffarian, S., Collier, I. E., Marmer, B. L., Elson, E. L. & Goldberg, G. Interstitial  
365 collagenase is a Brownian ratchet driven by proteolysis of collagen. *Science* **306**, 108-111  
366 (2004).
- 367 13 Kumar, L., Colomb, W., Czerski, J., Cox, C. R. & Sarkar, S. K. Efficient protease based  
368 purification of recombinant matrix metalloprotease-1 in *E. coli*. *Protein expression and*  
369 *purification* **148**, 59-67 (2018).
- 370 14 Neumann, U., Kubota, H., Frei, K., Ganu, V. & Leppert, D. Characterization of Mca-Lys-  
371 Pro-Leu-Gly-Leu-Dpa-Ala-Arg-NH<sub>2</sub>, a fluorogenic substrate with increased specificity  
372 constants for collagenases and tumor necrosis factor converting enzyme. *Analytical*  
373 *biochemistry* **328**, 166-173 (2004).
- 374 15 Kamerlin, S. C. & Warshel, A. Reply to Karplus: Conformational dynamics have no role  
375 in the chemical step. *Proceedings of the National Academy of Sciences* **107**, E72-E72  
376 (2010).

- 377 16 Patterson, M. L., Atkinson, S. J., Knäuper, V. & Murphy, G. Specific collagenolysis by  
378 gelatinase A, MMP-2, is determined by the hemopexin domain and not the fibronectin-like  
379 domain. *FEBS letters* **503**, 158-162 (2001).
- 380 17 Saito, S. *et al.* Role of matrix metalloproteinases 1, 2, and 9 and tissue inhibitor of matrix  
381 metalloproteinase-1 in chronic venous insufficiency. *Journal of Vascular Surgery* **34**, 930-  
382 937 (2001).
- 383 18 Asahi, M. *et al.* Role for matrix metalloproteinase 9 after focal cerebral ischemia, effects  
384 of gene knockout and enzyme inhibition with BB-94. *Journal of Cerebral Blood Flow and*  
385 *Metabolism* **20**, 1681-1689 (2000).
- 386 19 Fujimura, M. *et al.* Early appearance of activated matrix metalloproteinase-9 and blood-  
387 brain barrier disruption in mice after focal cerebral ischemia and reperfusion. *Brain*  
388 *Research* **842**, 92-100 (1999).
- 389 20 Hanemaaijer, R., Visser, H., Konttinen, Y. T., Koolwijk, P. & Verheijen, J. H. A novel and  
390 simple immunocapture assay for determination of gelatinase-B (MMP-9) activities in  
391 biological fluids: Saliva from patients with Sjogren's syndrome contain increased latent  
392 and active gelatinase-B levels. *Matrix Biology* **17**, 657-665 (1998).
- 393 21 Koshiha, T. *et al.* Detection of matrix metalloproteinase activity in human pancreatic  
394 cancer. *Surgery Today-the Japanese Journal of Surgery* **27**, 302-304 (1997).
- 395 22 Sakalihasan, N., Delvenne, P., Nusgens, B. V., Limet, R. & Lapiere, C. M. Activated forms  
396 of MMP(2) and MMP(9) in abdominal aortic aneurysms. *Journal of Vascular Surgery* **24**,  
397 127-133 (1996).
- 398 23 Goldberg, G. I., Strongin, A., Collier, I., Genrich, L. & Marmer, B. Interaction of 92-kDa  
399 type IV collagenase with the tissue inhibitor of metalloproteinases prevents dimerization,  
400 complex formation with interstitial collagenase, and activation of the proenzyme with  
401 stromelysin. *Journal of Biological Chemistry* **267**, 4583-4591 (1992).
- 402 24 Powell, B., Malaspina, D. C., Szleifer, I. & Dhaher, Y. Effect of collagenase-gelatinase  
403 ratio on the mechanical properties of a collagen fibril: a combined Monte Carlo-molecular  
404 dynamics study. *Biomechanics and modeling in mechanobiology*, 1-11 (2019).
- 405 25 Golub, L. *et al.* Tetracyclines inhibit tissue collagenase activity. *Journal of periodontal*  
406 *research* **19**, 651-655 (1984).
- 407 26 Jarymowycz, V. A. & Stone, M. J. Fast time scale dynamics of protein backbones: NMR  
408 relaxation methods, applications, and functional consequences. *Chemical reviews* **106**,  
409 1624-1671 (2006).
- 410 27 Singh, W., Fields, G. B., Christov, C. Z. & Karabancheva-Christova, T. G. Importance of  
411 the Linker Region in Matrix Metalloproteinase-1 Domain Interactions. *RSC advances* **6**,  
412 23223-23232, doi:10.1039/C6RA03033E (2016).
- 413 28 Ratnikov, B. I. *et al.* Basis for substrate recognition and distinction by matrix  
414 metalloproteinases. *Proceedings of the National Academy of Sciences* **111**, E4148-E4155  
415 (2014).
- 416 29 Piccard, H., Van den Steen, P. E. & Opdenakker, G. Hemopexin domains as  
417 multifunctional liganding modules in matrix metalloproteinases and other proteins. *Journal*  
418 *of leukocyte biology* **81**, 870-892 (2007).
- 419 30 Overall, C. M. Molecular determinants of metalloproteinase substrate specificity.  
420 *Molecular biotechnology* **22**, 51-86 (2002).
- 421 31 Clark, I. M. & Cawston, T. E. Fragments of human fibroblast collagenase. Purification and  
422 characterization. *Biochemical Journal* **263**, 201-206 (1989).

- 423 32 Eyal, E., Yang, L.-W. & Bahar, I. Anisotropic network model: systematic evaluation and  
424 a new web interface. *Bioinformatics* **22**, 2619-2627 (2006).
- 425 33 Isin, B., Tirupula, K. C., Oltvai, Z. N., Klein-Seetharaman, J. & Bahar, I. in *Membrane*  
426 *Protein Structure and Dynamics* 285-317 (Springer, 2012).
- 427 34 Abraham, M. J. *et al.* GROMACS: High performance molecular simulations through  
428 multi-level parallelism from laptops to supercomputers. *SoftwareX* **1**, 19-25 (2015).
- 429 35 Hess, B., Bekker, H., Berendsen, H. J. & Fraaije, J. G. LINCS: a linear constraint solver  
430 for molecular simulations. *Journal of computational chemistry* **18**, 1463-1472 (1997).
- 431 36 Darden, T., York, D. & Pedersen, L. Particle mesh Ewald: An  $N \cdot \log(N)$  method for Ewald  
432 sums in large systems. *The Journal of chemical physics* **98**, 10089-10092 (1993).
- 433 37 Hoover, W. G. Canonical dynamics: Equilibrium phase-space distributions. *Physical*  
434 *review A* **31**, 1695 (1985).
- 435 38 Parrinello, M. & Rahman, A. Polymorphic transitions in single crystals: A new molecular  
436 dynamics method. *Journal of Applied physics* **52**, 7182-7190 (1981).
- 437 39 Nash, A., Birch, H. L. & de Leeuw, N. H. Mapping intermolecular interactions and active  
438 site conformations: from human MMP-1 crystal structure to molecular dynamics free  
439 energy calculations. *Journal of Biomolecular Structure and Dynamics* **35**, 564-573 (2017).
- 440
